# Supplementary material for: Competing atmospheric reactions of CH2OO with SO2and water vapour
Source: Royal Society of Chemistry journal article supplement (doi:10.1039/c4cp02345e), 2014-08-01
Supplement: c4cp02345e1.pdf [file c4cp02345e1.pdf]

## Supporting Information

### C<sub>2</sub>H<sub>4</sub> purity

The purity of the ethene feed was checked by means of GC-MS analysis (Agilent, GC 6890 with MSD 5973, separation column: HP-5MS 19091S-433) with special attention to other unsaturated compounds. A flow of [C<sub>2</sub>H<sub>4</sub>] = 5.0 · 10<sup>13</sup> molecule cm<sup>-3</sup> from a gas mixing unit in air at 1 bar was pumped continuously through a heated GC-loop coupled with a pre-focusing device where the gas sample from the GC-loop was flushed through an uncoated, deactivated fused silica capillary (0.32 mm i.d.) and trapped at liquid N<sub>2</sub> temperature. After flash heating, the substances were directly injected at the separation column. This approach allows the detection of compounds with concentrations down to 10<sup>9</sup> molecule cm<sup>-3</sup>.<sup>S1</sup> Figure S1 shows the total ion chromatogram in the range 35 - 150 amu. Ethene is not detectable under these conditions, but all other unsaturated impurities like propene, the butenes, etc. Beside the system-permanent impurities acetone and benzene, no other compounds were observed. A conservative estimated yields an upper limit of unsaturated impurities of 5 · 10<sup>9</sup> molecule cm<sup>-3</sup>, i.e. 1/10<sup>4</sup> of the concentration of ethene.

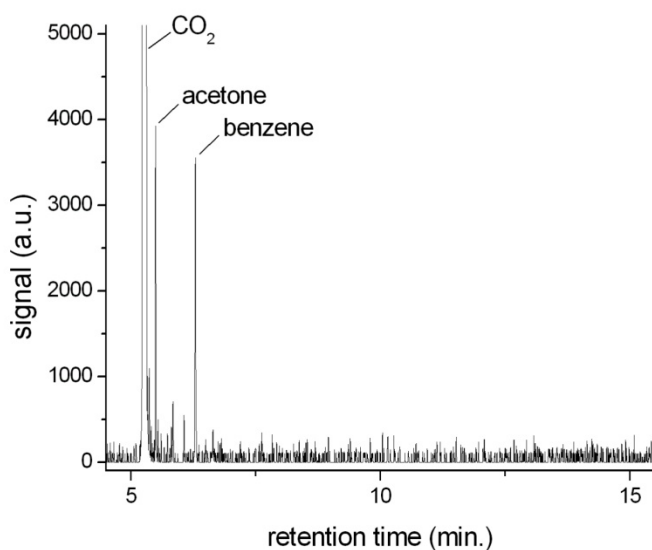

**Fig.S1:** Gas chromatogram of an ethene sample (5.0 · 10<sup>13</sup> molecule cm<sup>-3</sup>) diluted in air.

## Modelling of the reaction system

Modelling of the reaction system at RH = 0% has been performed in order to assess the importance of different steps for the consumption of CH<sub>2</sub>OO under the chosen experimental conditions. For simplicity, the OH radical chemistry was omitted because all runs for the CH<sub>2</sub>OO kinetics were conducted in presence of an OH radical scavenger.

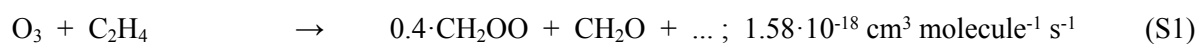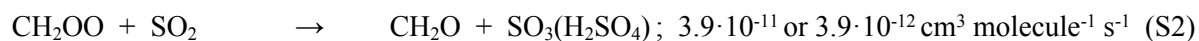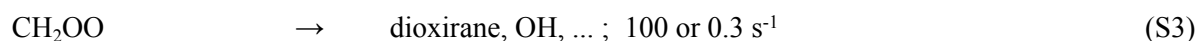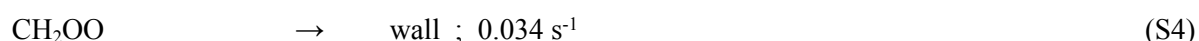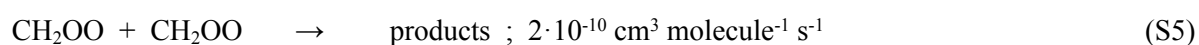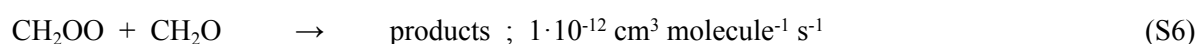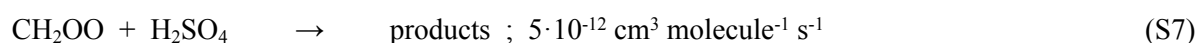

The rate coefficient  $k_{\text{S1}}$  was taken from ref.S2, the CH<sub>2</sub>OO formation yield of 0.4 for reaction (S1) from literature data and as a result of this study (see main text) and the CH<sub>2</sub>O formation yield of unity from ref.S3. For  $k_{\text{S2}}$  the value by Welz et al.<sup>S4</sup> or one-tenth of that was used. Immediate H<sub>2</sub>SO<sub>4</sub> formation from SO<sub>3</sub> in the RH range of 2 - 50% is assumed. For  $k_{\text{S3}}$  the data by Welz et al.<sup>S4</sup> (100 s<sup>-1</sup> representing probably an upper limit) or Olzmann et al.<sup>S5</sup> (0.3 s<sup>-1</sup>) was taken. The first-order rate coefficient for the diffusion-limited wall loss was estimated according  $k_{\text{S4}} = 3.65 \cdot D/r^2$ , D = diffusion coefficient of CH<sub>2</sub>OO and r stands for the tube radius. As the diffusion coefficient a value of 0.15 cm<sup>2</sup> s<sup>-1</sup> was adopted from experimental data for H<sub>2</sub>O<sub>2</sub><sup>S6</sup> resulting in  $k_{\text{S4}} = 0.034 \text{ s}^{-1}$ . The rate coefficient  $k_{\text{S5}}$  was taken from literature<sup>S7</sup> and for  $k_{\text{S6}}$  a value obtained for CH<sub>2</sub>OO + CH<sub>3</sub>CHO<sup>S8</sup> was applied. The rate coefficient  $k_{\text{S7}}$  was taken from literature<sup>S9</sup> Initial conditions are: [O<sub>3</sub>] = 2.2 · 10<sup>11</sup>, [C<sub>2</sub>H<sub>4</sub>] = 1.5 · 10<sup>13</sup> and [SO<sub>2</sub>] = 1 · 10<sup>12</sup> molecule cm<sup>-3</sup>, t = 39.5s.

**Table S1:** Result from modelling, pathways (S1) – (S6)

|                                                                     |                      |                      |                      |
|---------------------------------------------------------------------|----------------------|----------------------|----------------------|
| $k_{S2}$ ( $\text{cm}^3 \text{ molecule}^{-1} \text{ s}^{-1}$ )     | $3.9 \cdot 10^{-11}$ | $3.9 \cdot 10^{-11}$ | $3.9 \cdot 10^{-12}$ |
| $k_{S3}$ ( $\text{s}^{-1}$ )                                        | 100                  | 0.3                  | 0.3                  |
| steady state $[\text{CH}_2\text{OO}]$ ( $\text{molecule cm}^{-3}$ ) | $1.5 \cdot 10^4$     | $5.3 \cdot 10^4$     | $4.9 \cdot 10^5$     |
| CH <sub>2</sub> OO fraction reacting via                            |                      |                      |                      |
| path (S2)                                                           | 0.28                 | 0.99                 | 0.92                 |
| path (S3)                                                           | 0.72                 | $7.6 \cdot 10^{-3}$  | 0.07                 |
| path (S4)                                                           | $2.4 \cdot 10^{-4}$  | $8.6 \cdot 10^{-4}$  | $8.0 \cdot 10^{-3}$  |
| path (S5)                                                           | $2.1 \cdot 10^{-8}$  | $2.7 \cdot 10^{-7}$  | $2.3 \cdot 10^{-5}$  |
| path (S6)                                                           | $7.4 \cdot 10^{-7}$  | $2.6 \cdot 10^{-6}$  | $2.4 \cdot 10^{-5}$  |
| path (S7)                                                           | $4.2 \cdot 10^{-7}$  | $5.2 \cdot 10^{-6}$  | $4.4 \cdot 10^{-5}$  |
| H <sub>2</sub> SO <sub>4</sub> fraction reacting via path (S7)      | $1.5 \cdot 10^{-6}$  | $5.2 \cdot 10^{-6}$  | $4.8 \cdot 10^{-5}$  |

The CH<sub>2</sub>OO fraction reacting in the self reaction via path (S5), in the reaction with CH<sub>2</sub>O via path (S6) and with H<sub>2</sub>SO<sub>4</sub> via path (S7) is in each case smaller than  $10^{-4}$  (0.01 %) even for the lower rate coefficient  $k_{S2}$  and the lower value for  $k_{S3}$  (and low  $[\text{SO}_2] = 10^{12} \text{ molecule cm}^{-3}$ ). The diffusion-limited wall loss accounts for less than 1 % of CH<sub>2</sub>OO consumption. The importance of pathways (S4) – (S6) is further pushed back for rising SO<sub>2</sub> concentrations and in the presence of water vapour. The steady state CH<sub>2</sub>OO concentrations in these scenarios are in the range  $10^4 - 5 \cdot 10^5 \text{ molecule cm}^{-3}$  and become lower with increasing SO<sub>2</sub> concentrations and increasing water vapour content. The H<sub>2</sub>SO<sub>4</sub> fraction reacting with CH<sub>2</sub>OO is also very small and cannot influence the data analysis.

## Prompt OH radical formation

For high SO<sub>2</sub> concentrations (CH<sub>2</sub>OO titration by SO<sub>2</sub>), the measurements in absence of C<sub>3</sub>H<sub>8</sub> showed some higher H<sub>2</sub>SO<sub>4</sub> concentrations compared with the conditions in presence of C<sub>3</sub>H<sub>8</sub> for OH radical scavenging, see Fig.2a. The additional H<sub>2</sub>SO<sub>4</sub> is attributed to prompt OH radicals (y<sub>1</sub>) reacting with SO<sub>2</sub> (~ 10<sup>14</sup> molecule cm<sup>-3</sup>) in competition with the reaction with C<sub>2</sub>H<sub>4</sub> (1.5·10<sup>13</sup> molecule cm<sup>-3</sup>).

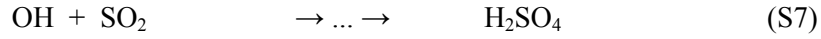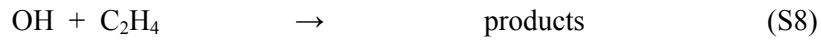

The concentration of formed OH is:

$$[\text{OH}] = [\text{H}_2\text{SO}_4] \cdot \left(1 + \frac{k_{S8}[\text{C}_2\text{H}_4]}{k_{S7}[\text{SO}_2]}\right) \quad (\text{SI})$$

Rearrangement yields:

$$[\text{H}_2\text{SO}_4] = [\text{OH}] \cdot 1 / \left(1 + \frac{k_{S8}[\text{C}_2\text{H}_4]}{k_{S7}[\text{SO}_2]}\right) \quad (\text{SII})$$

In Fig.S2 the data for the additional [H<sub>2</sub>SO<sub>4</sub>] are plotted according to equation (SII) for different RH. The slope through the origin yields total [OH] = (1.19 ± 0.05)·10<sup>7</sup> molecule cm<sup>-3</sup>. The amount of reacted [C<sub>2</sub>H<sub>4</sub>] = k<sub>4</sub>[C<sub>2</sub>H<sub>4</sub>][O<sub>3</sub>]·t was 2.06·10<sup>8</sup> molecule cm<sup>-3</sup> yielding a prompt OH radical yield y<sub>1</sub> = 0.06 ± 0.03. The error includes the uncertainty of H<sub>2</sub>SO<sub>4</sub> calibration.

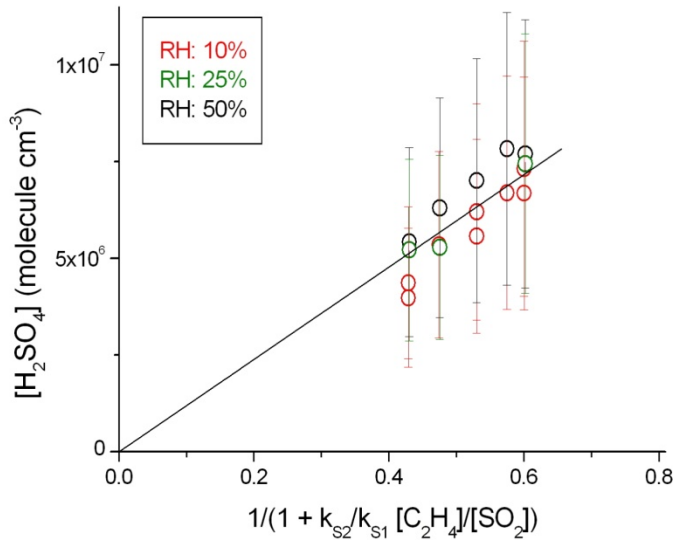

**Fig.S2:** Additional [H<sub>2</sub>SO<sub>4</sub>] for different RH plotted according to equation (SII). Error bars represent the uncertainty of the H<sub>2</sub>SO<sub>4</sub> measurement.

Supporting references:

- S1 T. Berndt and O. Böge, *Phys. Chem. Chem. Phys.*, 2006, **8**, 1205.
- S2 R. Atkinson, D. L. Baulch, R. A. Cox, R. F. Hampson, Jr., J. A. Kerr, M. J. Rossi and J. Troe, *J. Phys. Chem. Ref. Data*, 1997, **26**, 521.
- S3 E. Grosjean and D. Grosjean, *Enviro. Sci. Technol.*, 1996, **30**, 2036.
- S4 O. Welz, J. D. Savee, D. L. Osborn, S. S. Vasu, C. J. Percival, D. E. Shallcross and C. A. Taatjes, *Science*, 2012, **335**, 204.
- S5 M. Olzmann, E. Kraka, D. Cremer, R. Gutbrodt and S. Andersson, *J. Phys. Chem. A*, 1997, **101**, 9421.
- S6 A. V. Ivanov, S. Trakhtenberg, A. K. Bertram, Y. M. Gershenzon and M. J. Molina, *J. Phys. Chem. A*, 2007, **111**, 1632.
- S7 Y.-T. Su, H.-Y. Lin, R. Putikam, H. Matsui, M. C. Lin and Y.-P. Lee, *Nature Chem.*, 2014, doi: 10.1038/NCHEM.1890.
- S8 C. A. Taatjes, O. Welz, A. J. Eskola, J. D. Savee, D. L. Osborn, E. P. F. Lee, J. M. Dyke, D. K. W. Mok, D. E. Shallcross and C. J. Percival, *Phys. Chem. Chem. Phys.*, 2012, **14**, 10391.
- S9 L. Vereecken, H. Harder and A. Novelli, *Phys. Chem. Chem. Phys.*, 2012, **14**, 14682.
